# Supplementary material for: Association between red and processed meat intake and colorectal adenoma incidence and recurrence: a systematic review and meta-analysis
Source: PubMed Central journal article supplement (PMC6122348; doi:10.18632/oncotarget.23561), 2017-12-21
Supplement: oncotarget-09-32373-s001.pdf [file oncotarget-09-32373-s001.pdf]

# Association between red and processed meat intake and colorectal adenoma incidence and recurrence: a systematic review and meta-analysis

## SUPPLEMENTARY MATERIALS

**A**

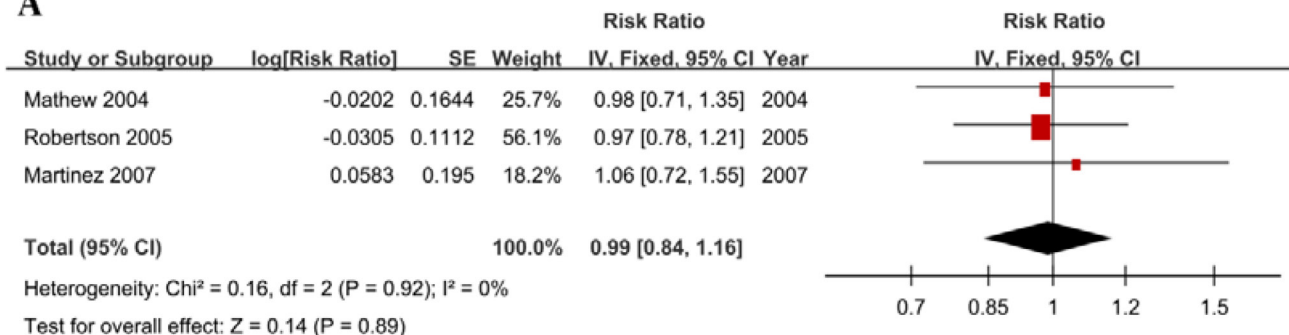

**B**

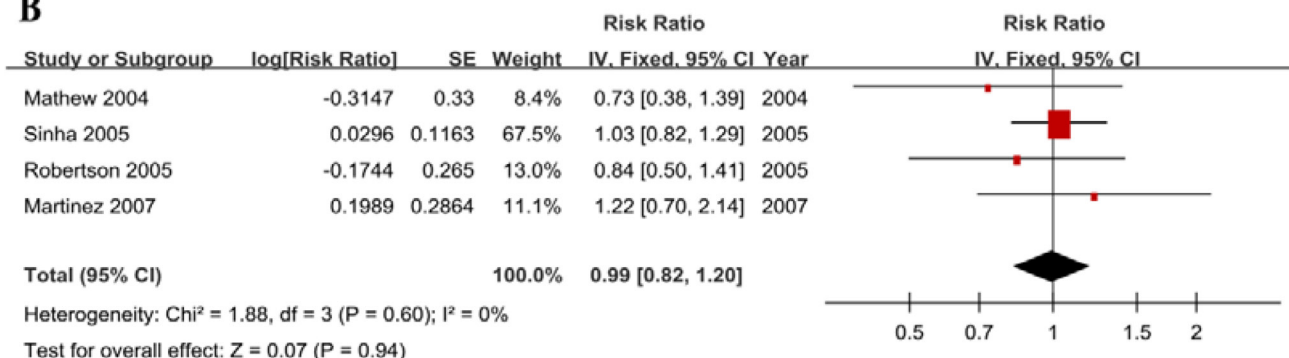

**C**

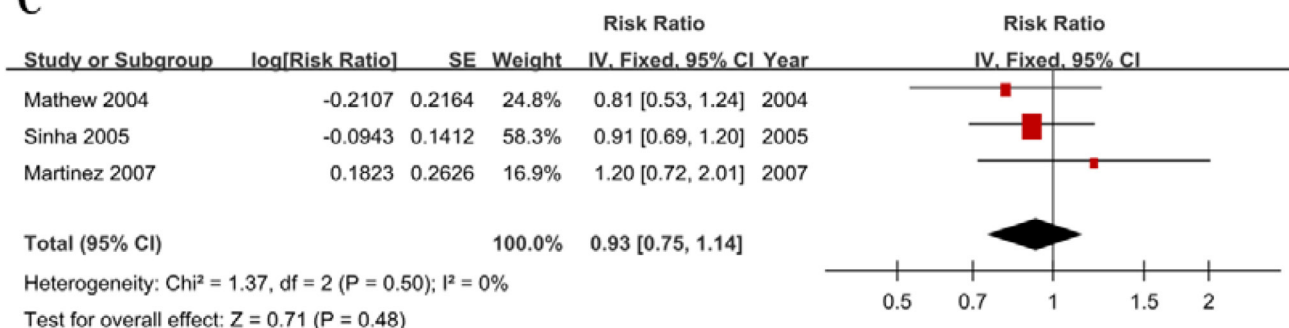

**Supplementary Figure 1: Forest plots of red meat intake and colorectal adenoma recurrence. (A) Total colorectal adenoma. (B) Advanced colorectal adenoma. (C) Multiple colorectal adenoma.**

**A**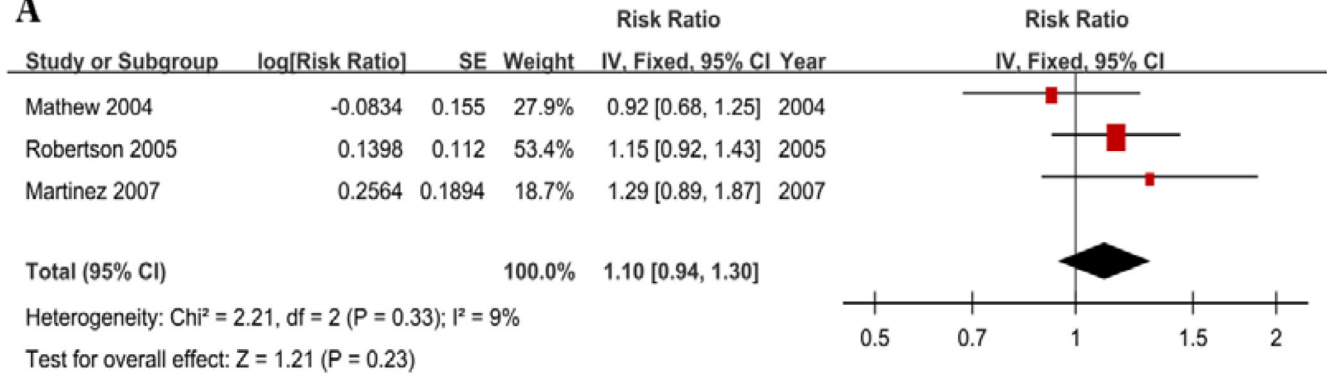**B**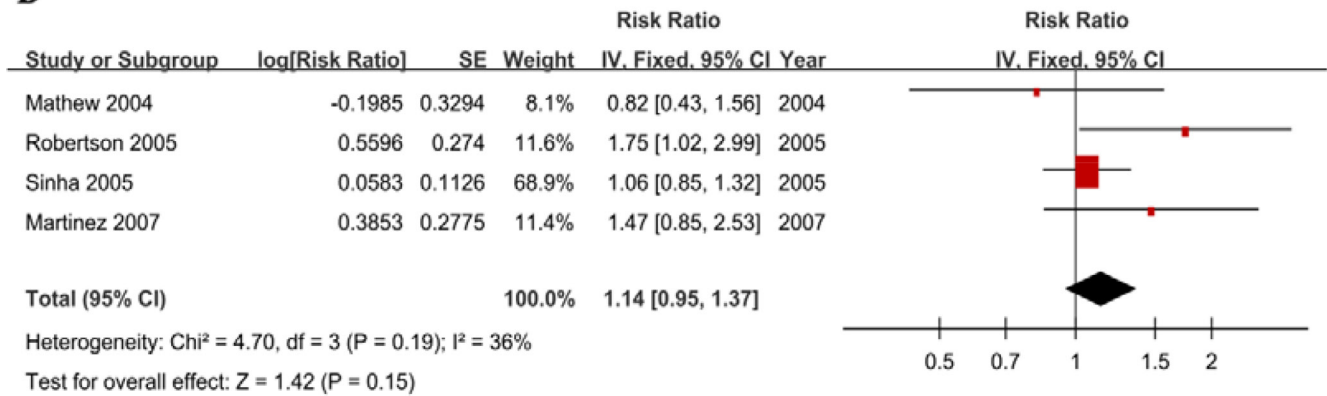**C**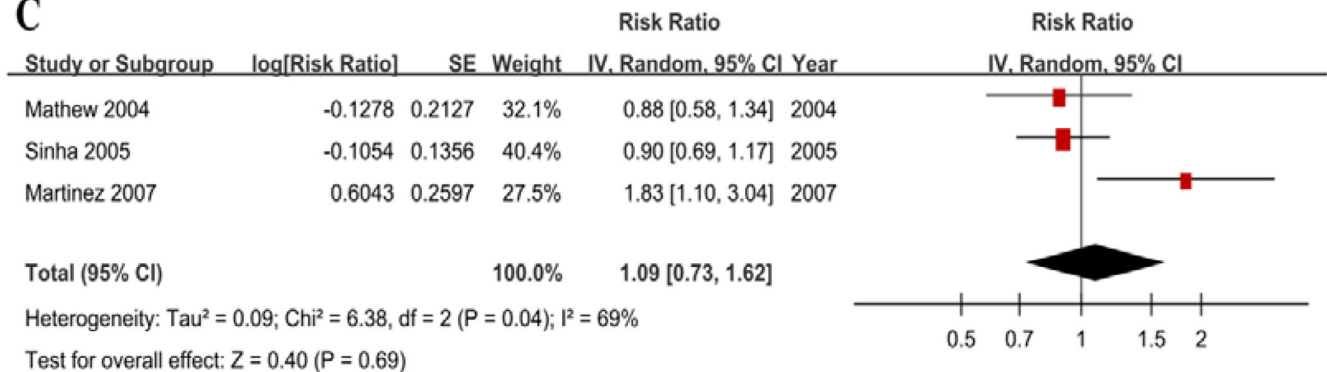

**Supplementary Figure 2: Forest plots of processed meat intake and colorectal adenoma recurrence.** (A) Total colorectal adenoma. (B) Advanced colorectal adenoma. (C) Multiple colorectal adenoma.

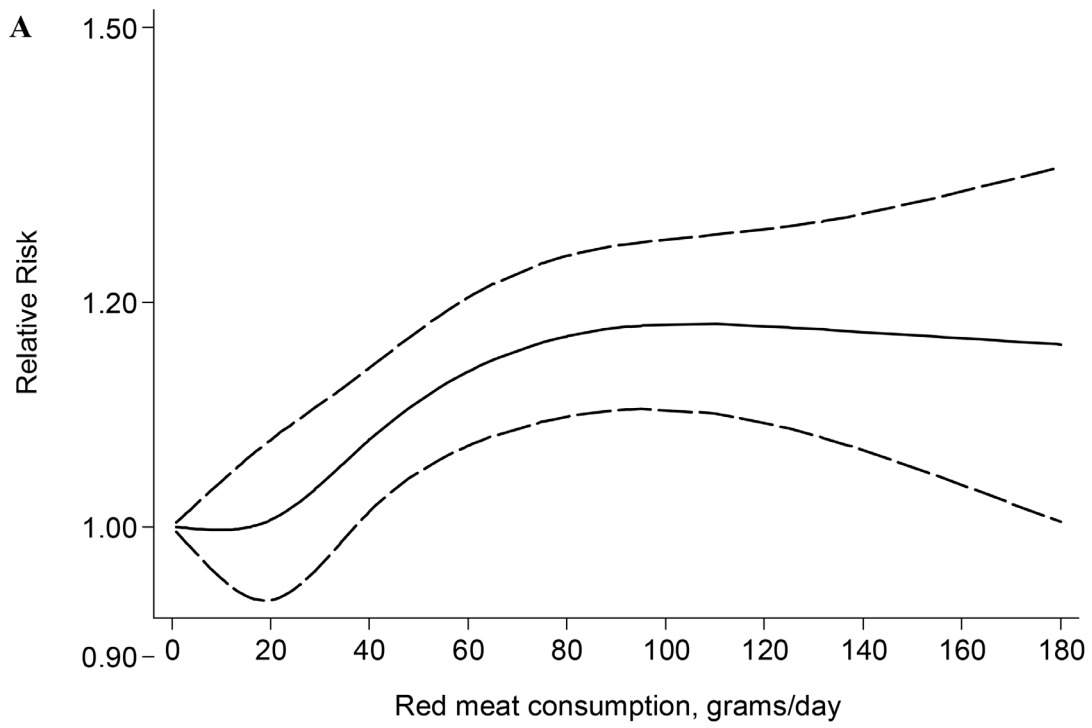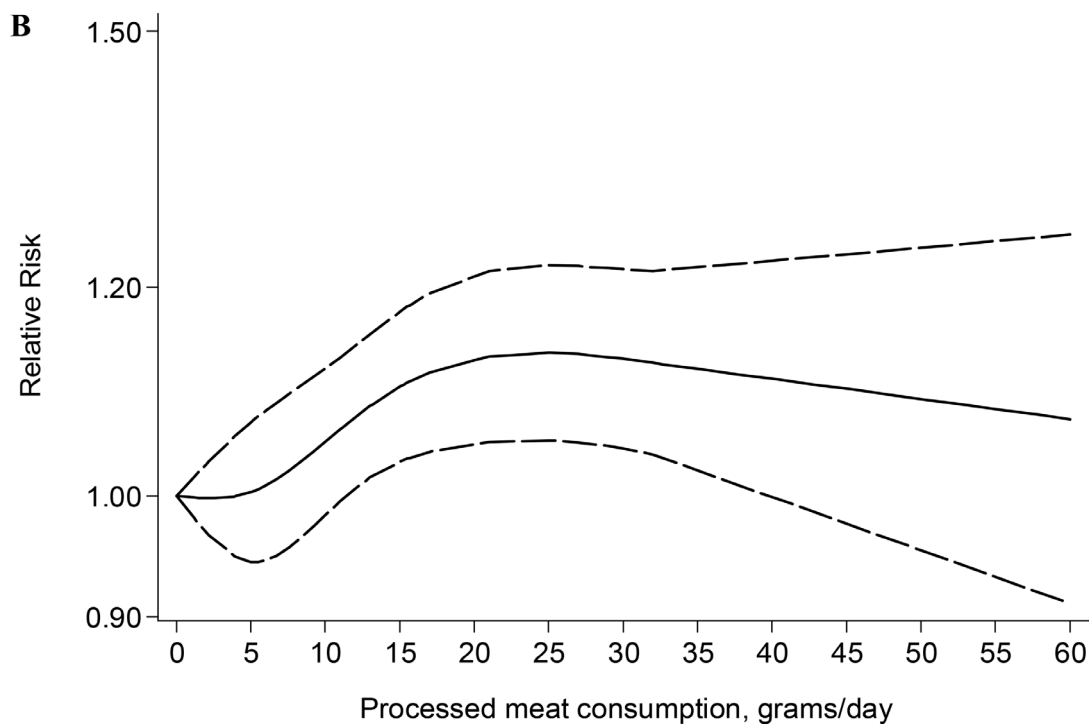

**Supplementary Figure 3:** Nonlinear associations between (A) red meat intake and (B) processed meat intake and colorectal adenoma incidence.

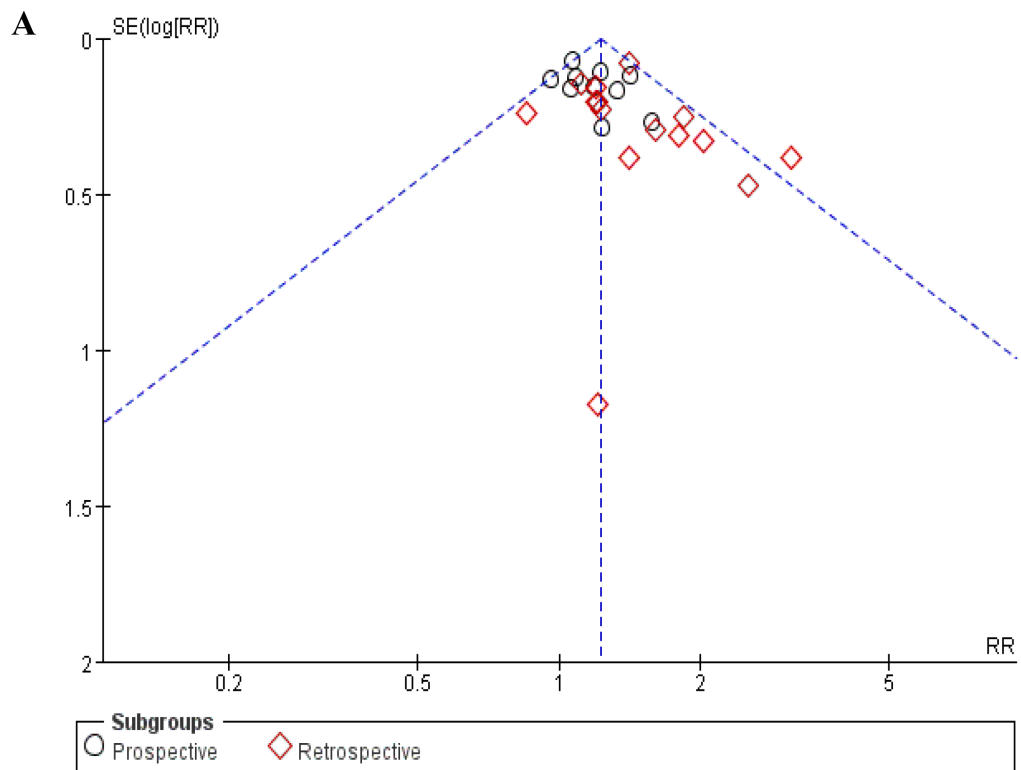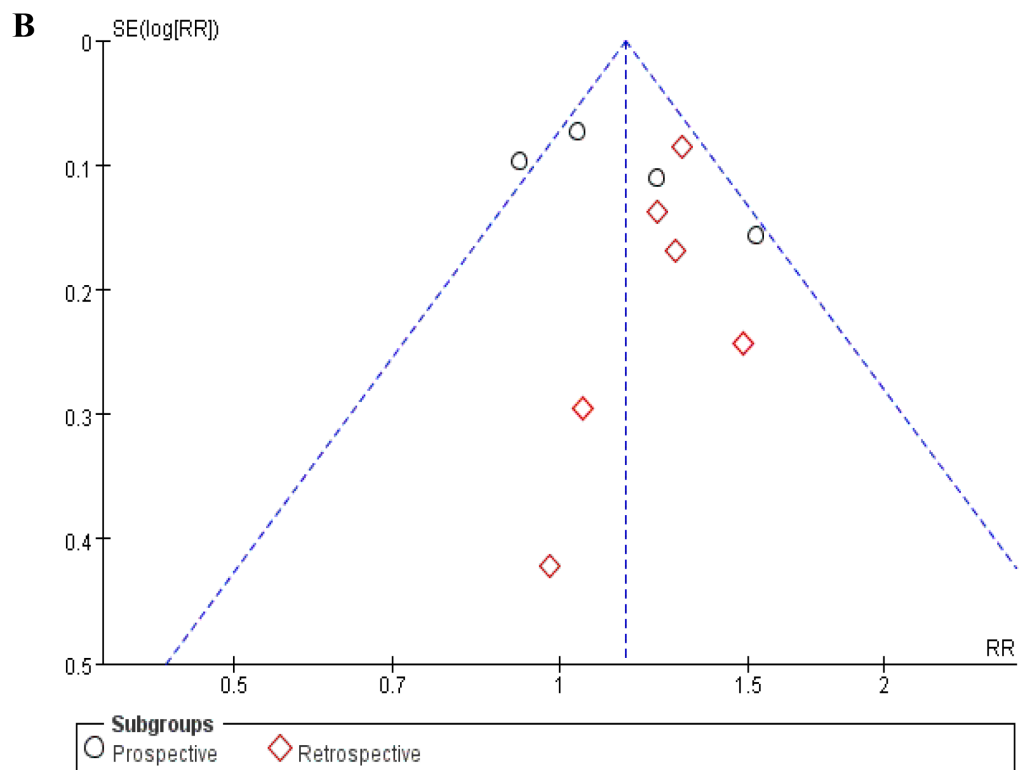

**Supplementary Figure 4: Funnel plots evaluating publication bias of red and processed meat intake and colorectal adenoma incidence. (A) Red meat. (B) Processed meat. SE: standard error. RR: relative risk.**

**Supplementary Table 1: Subgroup analyses of red meat intake for Highest vs Lowest comparisons and CRA incidence**

| Subgroups                           | Red meat |                         |       |       |             |
|-------------------------------------|----------|-------------------------|-------|-------|-------------|
|                                     | N        | RR (95% CI)             | $P_o$ | $P_h$ | $I_h^2$ (%) |
| <b>All studies</b>                  | 25       | <b>1.23 (1.15–1.31)</b> | < .01 | .13   | 25          |
| <b>Geographic area</b>              |          |                         |       |       |             |
| <b>America</b>                      | 15       | <b>1.22 (1.14–1.31)</b> | < .01 | .15   | 28          |
| <b>Europe</b>                       | 6        | <b>1.25 (1.03–1.52)</b> | .02   | .14   | 40          |
| <b>Asia</b>                         | 4        | 1.22 (1.00–1.50)        | .05   | .26   | 25          |
| <b>Sample size</b>                  |          |                         |       |       |             |
| <b>≥ 500</b>                        | 11       | <b>1.21 (1.13–1.30)</b> | < .01 | .27   | 18          |
| <b>&lt; 500</b>                     | 14       | 1.27 (1.12–1.44)        | < .01 | .12   | 32          |
| <b>Publication year</b>             |          |                         |       |       |             |
| <b>2005 or later</b>                | 17       | <b>1.21 (1.13–1.29)</b> | < .01 | .21   | 21          |
| <b>Before 2005</b>                  | 8        | 1.38 (1.15–1.65)        | < .01 | .20   | 29          |
| <b>Adjustments Smoking</b>          |          |                         |       |       |             |
| <b>Yes</b>                          | 16       | <b>1.22 (1.14–1.30)</b> | < .01 | .13   | 30          |
| <b>No</b>                           | 9        | 1.28 (1.08–1.53)        | < .01 | .25   | 21          |
| <b>Alcohol</b>                      |          |                         |       |       |             |
| <b>Yes</b>                          | 15       | <b>1.21 (1.13–1.30)</b> | < .01 | .13   | 30          |
| <b>No</b>                           | 10       | 1.29 (1.10–1.51)        | < .01 | .26   | 20          |
| <b>BMI</b>                          |          |                         |       |       |             |
| <b>Yes</b>                          | 16       | <b>1.29 (1.20–1.40)</b> | < .01 | .09   | 34          |
| <b>No</b>                           | 9        | 1.11 (0.99–1.23)        | .06   | .88   | 0           |
| <b>Energy intake</b>                |          |                         |       |       |             |
| <b>Yes</b>                          | 17       | <b>1.25 (1.16–1.34)</b> | < .01 | .04   | 41          |
| <b>No</b>                           | 8        | 1.16 (1.01–1.33)        | .04   | .82   | 0           |
| <b>Physical activity</b>            |          |                         |       |       |             |
| <b>Yes</b>                          | 16       | <b>1.23 (1.15–1.32)</b> | < .01 | .12   | 30          |
| <b>No</b>                           | 9        | 1.20 (1.03–1.41)        | .02   | .24   | 23          |
| <b>Dietary fiber</b>                |          |                         |       |       |             |
| <b>Yes</b>                          | 8        | <b>1.21 (1.10–1.32)</b> | < .01 | .16   | 33          |
| <b>No</b>                           | 17       | 1.24 (1.14–1.35)        | < .01 | .17   | 24          |
| <b>Family history of CRC/polyps</b> |          |                         |       |       |             |
| <b>Yes</b>                          | 10       | <b>1.21 (1.09–1.33)</b> | < .01 | .50   | 0           |
| <b>No</b>                           | 15       | 1.24 (1.14–1.35)        | < .01 | .06   | 40          |
| <b>NSAIDs</b>                       |          |                         |       |       |             |
| <b>Yes</b>                          | 12       | <b>1.24 (1.15–1.33)</b> | < .01 | .12   | 34          |
| <b>No</b>                           | 13       | 1.19 (1.05–1.35)        | < .01 | .25   | 19          |

NOTE. Boldface indicates statistical significance.

N: number of included studies. CRA: colorectal adenoma. CRC: colorectal cancer. BMI: body mass index. NSAIDs: non-steroidal anti-inflammatory drugs.  $P_o$ : test for over effect.  $P_h$ :  $P$  value for heterogeneity within each subgroup.  $I_h^2$ :  $I^2$  value for heterogeneity within each subgroup.

**Supplementary Table 2: Subgroup analyses of processed meat intake for Highest vs Lowest comparisons and CRA incidence**

| Subgroups                           | Processed meat |                         |                 |       |             |
|-------------------------------------|----------------|-------------------------|-----------------|-------|-------------|
|                                     | N              | RR (95% CI)             | $P_o$           | $P_h$ | $I_h^2$ (%) |
| <b>All studies</b>                  | 10             | <b>1.15 (1.07–1.24)</b> | <b>&lt; .01</b> | .10   | 39          |
| <b>Geographic area</b>              |                |                         |                 |       |             |
| <b>America</b>                      | 9              | <b>1.15 (1.06–1.24)</b> | <b>&lt; .01</b> | .07   | 44          |
| <b>Europe</b>                       | 0              | -                       | -               | -     | -           |
| <b>Asia</b>                         | 1              | 1.28 (0.92–1.78)        | .14             | -     | -           |
| <b>Sample size</b>                  |                |                         |                 |       |             |
| <b>≥ 500</b>                        | 7              | <b>1.18 (1.04–1.33)</b> | <b>.01</b>      | .04   | 55          |
| <b>&lt; 500</b>                     | 3              | 1.23 (0.88–1.72)        | .22             | .56   | 0           |
| <b>Publication year</b>             |                |                         |                 |       |             |
| <b>2005 or later</b>                | 9              | <b>1.16 (1.04–1.30)</b> | <b>&lt; .01</b> | .09   | 41          |
| <b>Before 2005</b>                  | 1              | 1.48 (0.92–2.38)        | .11             | -     | -           |
| <b>Adjustments Smoking</b>          |                |                         |                 |       |             |
| <b>Yes</b>                          | 10             | <b>1.18 (1.06–1.31)</b> | <b>&lt; .01</b> | .54   | 0           |
| <b>No</b>                           | 0              | -                       | -               | -     | -           |
| <b>Alcohol</b>                      |                |                         |                 |       |             |
| <b>Yes</b>                          | 7              | <b>1.13 (1.04–1.22)</b> | <b>&lt; .01</b> | .13   | 40          |
| <b>No</b>                           | 3              | 1.45 (1.14–1.86)        | .20             | .90   | 0           |
| <b>BMI</b>                          |                |                         |                 |       |             |
| <b>Yes</b>                          | 8              | <b>1.18 (1.05–1.32)</b> | <b>&lt; .01</b> | .22   | 26          |
| <b>No</b>                           | 2              | 1.23 (0.85–1.77)        | .28             | .03   | 79          |
| <b>Energy intake</b>                |                |                         |                 |       |             |
| <b>Yes</b>                          | 8              | <b>1.17 (1.04–1.33)</b> | <b>&lt; .01</b> | .05   | 51          |
| <b>No</b>                           | 2              | 1.23 (0.91–1.68)        | .55             | -     | -           |
| <b>Physical activity</b>            |                |                         |                 |       |             |
| <b>Yes</b>                          | 10             | <b>1.18 (1.06–1.31)</b> | <b>&lt; .01</b> | .54   | 0           |
| <b>No</b>                           | 0              | -                       | -               | -     | -           |
| <b>Dietary fiber</b>                |                |                         |                 |       |             |
| <b>Yes</b>                          | 5              | 1.11 (0.99–1.24)        | .07             | .53   | 0           |
| <b>No</b>                           | 5              | 1.21 (1.02–1.45)        | .03             | .03   | 63          |
| <b>Family history of CRC/polyps</b> |                |                         |                 |       |             |
| <b>Yes</b>                          | 6              | <b>1.16 (0.97–1.39)</b> | <b>.10</b>      | .09   | 47          |
| <b>No</b>                           | 4              | 1.19 (1.03–1.38)        | .02             | .16   | 42          |
| <b>NSAIDs</b>                       |                |                         |                 |       |             |
| <b>Yes</b>                          | 8              | <b>1.18 (1.04–1.34)</b> | <b>.01</b>      | .05   | 51          |
| <b>No</b>                           | 2              | 1.20 (0.93–1.55)        | .16             | .61   | 0           |

NOTE. Boldface indicates statistical significance.

N: number of included studies. CRA: colorectal adenoma. CRC: colorectal cancer. BMI: body mass index. NSAIDs: nonsteroidal anti-inflammatory drugs.  $P_o$ : test for over effect.  $P_h$ :  $P$  value for heterogeneity within each subgroup.  $I_h^2$ :  $I^2$  value for heterogeneity within each subgroup.
